# Supplementary material
Source: Springer Nature journal article supplement (https://www.springermedizin.de/resource/supplementary/12888_2011_1034_MOESM1_ESM.pdf/9479666)
Supplement: MOESM1 [file 9479666]

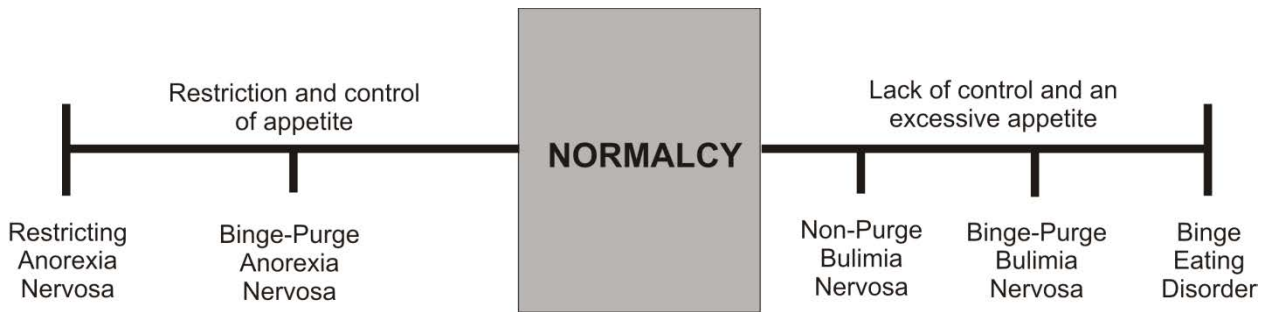

Restriction and control  
of appetite

Lack of control and an  
excessive appetite

**NORMALCY**

Restricting  
Anorexia  
Nervosa

Binge-Purge  
Anorexia  
Nervosa

Non-Purge  
Bulimia  
Nervosa

Binge-Purge  
Bulimia  
Nervosa

Binge  
Eating  
Disorder
